# Supplementary material for: FTY720 Effects on Inflammation and Liver Damage in a Rat Model of Renal Ischemia-Reperfusion Injury
Source: Hindawi journal article supplement (doi:10.1155/2019/3496836), 2019-03-20
Supplement: f1 [file 3496836.f1.pdf]

1 **Supplemental Figure S1: Differential expression heat maps from tissue in FTY720-treated versus**  
 2 **vehicle control treated rats following renal ischemia.** Tissues collected at 6, 24, and 72 hr point  
 3 post IRI were stored in RNALater and subsequently processed for mRNA. cDNA conversion of  
 4 1µg of RNA was performed by RT-PCR followed by semi-quantitative real-time PCR for gene  
 5 expression analysis using the  $2^{-\Delta\Delta CT}$  method. Data was then transposed into a Log<sub>2</sub> Base format  
 6 to better display the range of expression observed. A custom low density array panel of genes  
 7 relevant to ischemia reperfusion injury was selected for the analysis. For each tissue, gene  
 8 expression was quantified relative to naïve control tissue.  
 9 **Supplemental Figure S1-A:**

### Ischemic Kidney Gene Expression

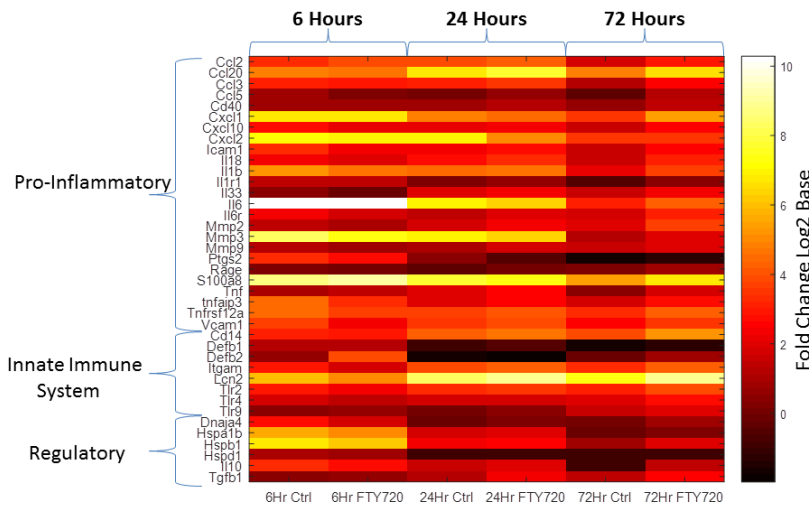

10

### Ischemic Kidney Gene Expression

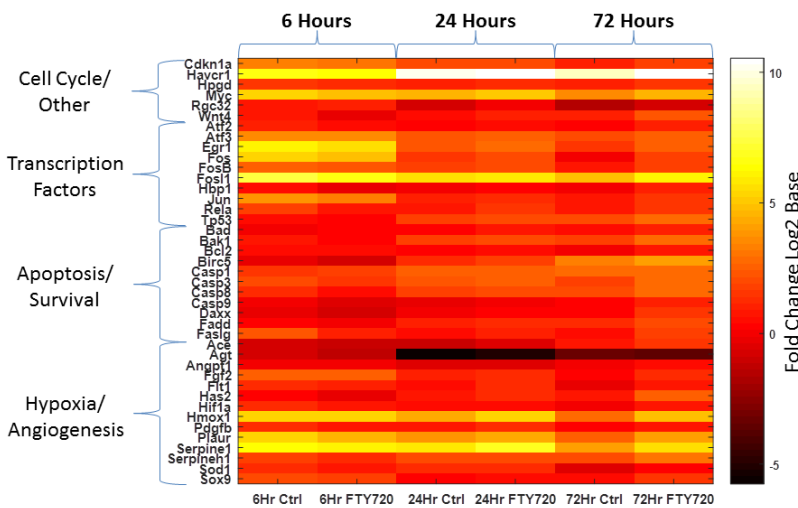

11

12 Supplemental Figure S1-B:

### Normal Kidney Gene Expression

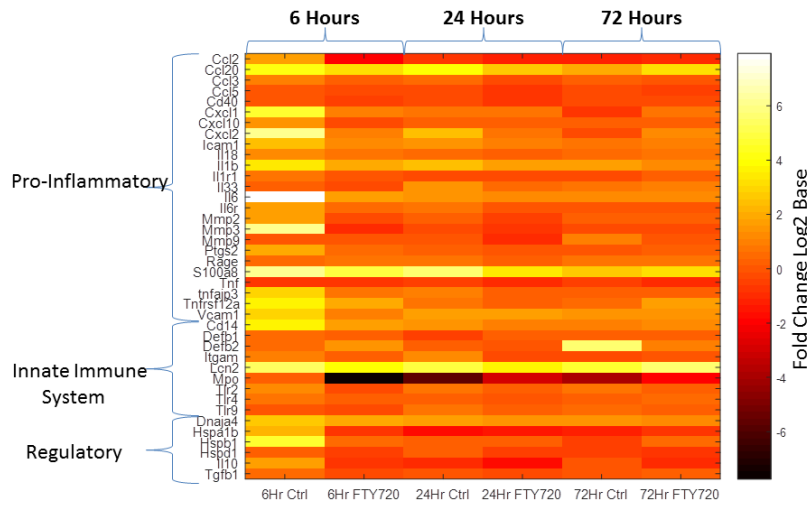

13

### Normal Kidney Gene Expression

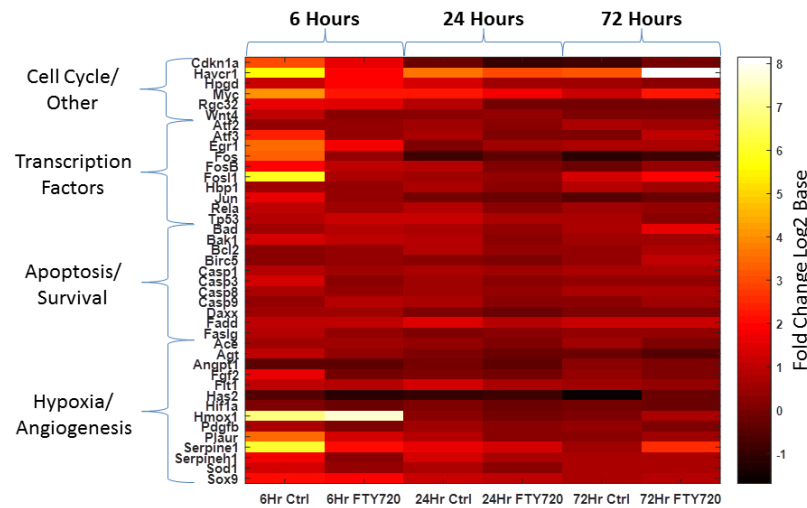

14

15

16 Supplemental Figure S1-C:

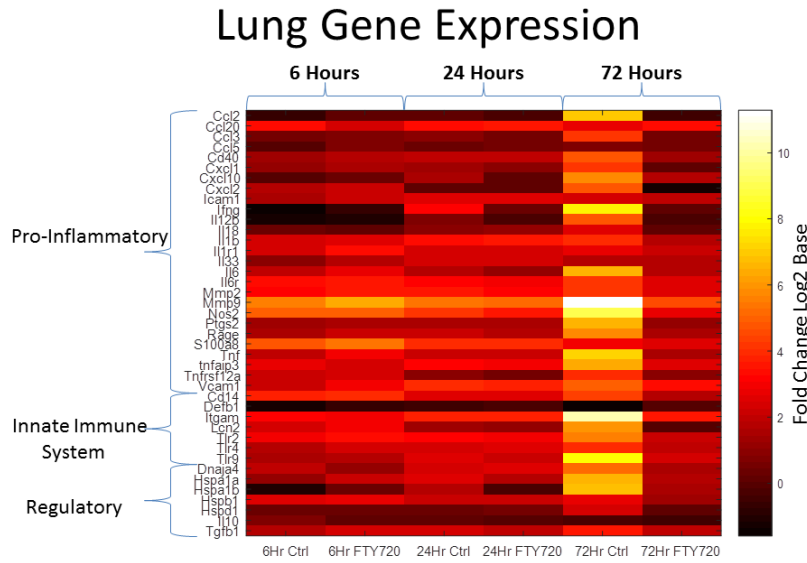

17

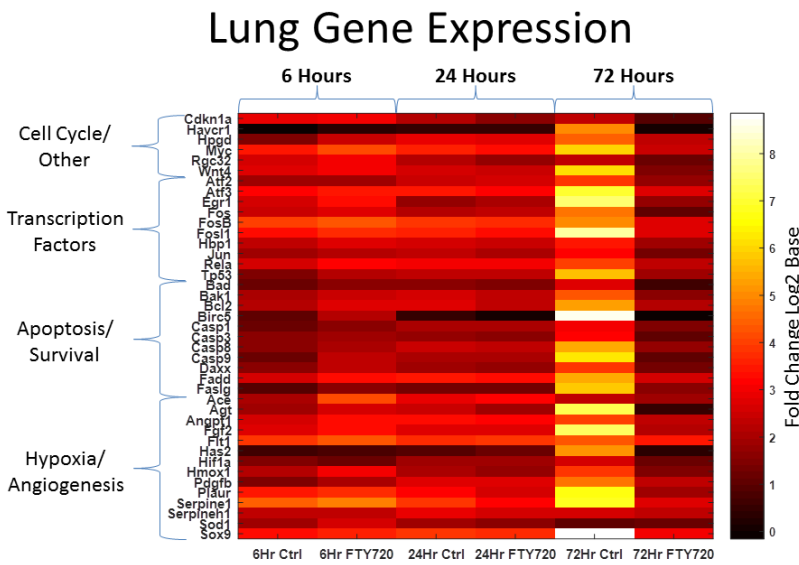

18

19 Supplemental Figure S1-D:  
20

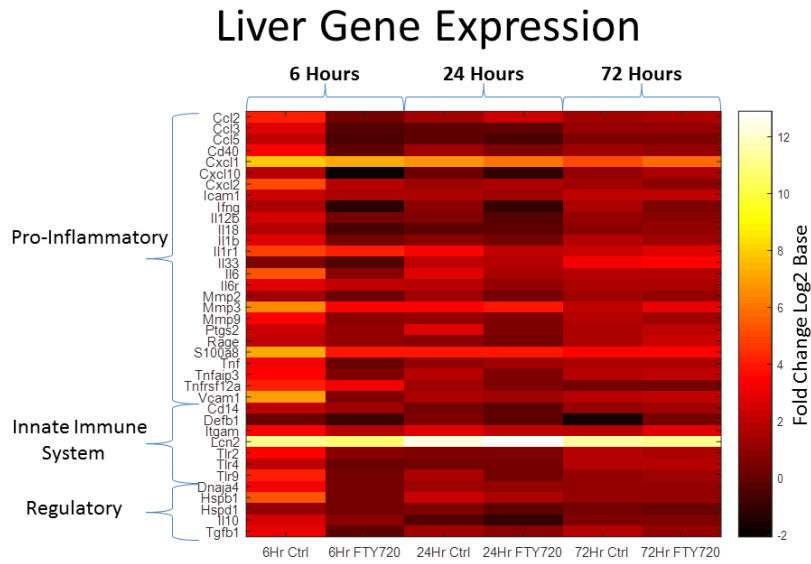

21

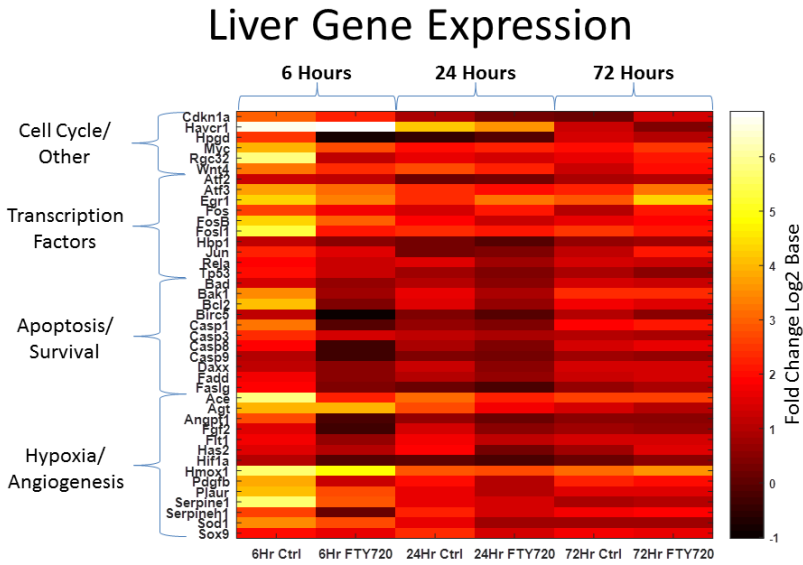

22
